# Supplementary material
Source: PubMed Central journal article supplement (PMC5891168)
Supplement: NIHMS883443-supplement-supplement_1.pdf [file NIHMS883443-supplement-supplement_1.pdf]

# Supplemental Materials to “Scalable Bayesian Variable Selection Using Nonlocal Prior Densities in Ultrahigh-dimensional Settings”

## 1 Preliminary Results

**Lemma 1.** For  $Q_{\mathbf{k}}$  defined in (6),  $\prod_{j=1}^k Q_{\mathbf{k},j}^L \leq Q_{\mathbf{k}} \leq \prod_{j=1}^k Q_{\mathbf{k},j}^U$ ,

where

$$\begin{aligned} Q_{\mathbf{k},j}^L &= c_1(\sigma^2)^{1/2}(n\nu_{\mathbf{k}^*} + 1/\tau_{n,p})^{-1/2} \exp\{-\tau_{n,p}/\tilde{\beta}_{\mathbf{k},j}^{*2}\}, \\ Q_{\mathbf{k},j}^U &= c_2(\sigma^2)^{1/2}(n\nu_{\mathbf{k}^*} + 1/\tau_{n,p})^{-1/2} \exp\{-\tau_{n,p}/(|\tilde{\beta}_{\mathbf{k},j}| + \tilde{\epsilon}_n)^2\}, \end{aligned}$$

and  $\tilde{\epsilon}_n \asymp (n\nu_{\mathbf{k}^*}/\tau_{n,p})^{-1/4}$ , with  $\tilde{\beta}_{\mathbf{k},j} \in [\tilde{\beta}_{\mathbf{k},j} - \tilde{\epsilon}_n, \tilde{\beta}_{\mathbf{k},j} + \tilde{\epsilon}_n] \setminus (-\tilde{\epsilon}_n, \tilde{\epsilon}_n)^c$  for some positive constants  $c_1$  and  $c_2$ .

*Proof.* Recall  $\tilde{\Sigma}_{\mathbf{k}} = (X_{\mathbf{k}}^T X_{\mathbf{k}} + 1/\tau_{n,p} \mathbf{I}_{\mathbf{k}})^{-1}$ . From (8), all eigenvalues of  $(\tilde{\Sigma}_{\mathbf{k}})^{-1}$  are bounded between  $n\nu_{\mathbf{k}^*} + 1/\tau_{n,p}$  and  $n\nu_{\mathbf{k}^*}^* + 1/\tau_{n,p}$ , which implies for all  $x \in \mathbb{R}^{|\mathbf{k}|}$ ,  $(n\nu_{\mathbf{k}^*} + 1/\tau_{n,p})x^T x \leq x^T (\tilde{\Sigma}_{\mathbf{k}})^{-1} x \leq (n\nu_{\mathbf{k}^*}^* + 1/\tau_{n,p})x^T x$ . Let  $T_{1n} = \{(n\nu_{\mathbf{k}^*} + 1/\tau_{n,p})/\sigma^2\}^{1/2}$  and  $T_{2n} = \{(n\nu_{\mathbf{k}^*}^* + 1/\tau_{n,p})/\sigma^2\}^{1/2}$ . Substituting the above inequality in the expression for  $Q_{\mathbf{k}}$ , we have

$$\prod_{j=1}^{|\mathbf{k}|} g_1(\tilde{\beta}_{\mathbf{k},j}) \leq Q_{\mathbf{k}} \leq \prod_{j=1}^{|\mathbf{k}|} g_2(\tilde{\beta}_{\mathbf{k},j}), \quad (\text{S1})$$

where

$$g_i(\tilde{\beta}_{\mathbf{k},j}) = \int_{-\infty}^{\infty} \exp\{-T_{in}^2(\beta_{\mathbf{k},j} - \tilde{\beta}_{\mathbf{k},j})^2/2 - \tau_{n,p}/\beta_{\mathbf{k},j}^2\} d\beta_{\mathbf{k},j}, \quad (\text{S2})$$

for  $i = 1, 2$ . We establish the lower bound first by showing that  $g_1(\tilde{\beta}_{\mathbf{k},j}) \geq Q_{\mathbf{k},j}^L$  for all  $j =$

$1, \dots, |\mathbf{k}|$ . Recall  $\tilde{\epsilon}_n \asymp (n\nu_{\mathbf{k}^*}/\tau_{n,p})^{-1/4}$  from the statement of the Lemma. We have

$$\begin{aligned} g_1(\tilde{\beta}_{\mathbf{k},j}) &\geq \int_{[\tilde{\beta}_{\mathbf{k},j}-\tilde{\epsilon}_n, \tilde{\beta}_{\mathbf{k},j}+\tilde{\epsilon}_n] \setminus (-\tilde{\epsilon}_n, \tilde{\epsilon}_n)^c} \exp\{-T_{1n}^2(\beta_{\mathbf{k},j} - \tilde{\beta}_{\mathbf{k},j})^2/2 - \tau_{n,p}/\beta_{\mathbf{k},j}^2\} d\beta_{\mathbf{k},j} \\ &\geq \exp\{-\tau_{n,p}/\tilde{\beta}_{\mathbf{k},j}^{*2}\} \int_{[\tilde{\beta}_{\mathbf{k},j}-\tilde{\epsilon}_n, \tilde{\beta}_{\mathbf{k},j}+\tilde{\epsilon}_n] \setminus (-\tilde{\epsilon}_n, \tilde{\epsilon}_n)^c} \exp\{-T_{1n}^2(\beta_{\mathbf{k},j} - \tilde{\beta}_{\mathbf{k},j})^2/2\} d\beta_{\mathbf{k},j}, \end{aligned}$$

for some  $\tilde{\beta}_{\mathbf{k},j}^* \in [\tilde{\beta}_{\mathbf{k},j} - \tilde{\epsilon}_n, \tilde{\beta}_{\mathbf{k},j} + \tilde{\epsilon}_n] \setminus (-\tilde{\epsilon}_n, \tilde{\epsilon}_n)^c$ . Then, the integral in the last line of the above display is equivalent to

$$\int_{[-\tilde{\epsilon}_n, \tilde{\epsilon}_n] \setminus (-\tilde{\beta}_{\mathbf{k},j}-\tilde{\epsilon}_n, -\tilde{\beta}_{\mathbf{k},j}+\tilde{\epsilon}_n)^c} e^{-T_{1n}^2 t^2/2} dt \geq c_1 T_{1n}^{-1} \int_0^{T_{1n}\tilde{\epsilon}_n} e^{-z^2/2} dz \geq c_2 T_{1n}^{-1},$$

where  $c_1$  and  $c_2$  are some positive constants and the last inequality in the above display follows since  $T_{1n}\tilde{\epsilon}_n \geq 1$  for large  $n$ . Substituting back in the previous display,  $g_1(\tilde{\beta}_{\mathbf{k},j}) \geq c_1 T_{1n}^{-1} \exp\{-\tau_{n,p}/\tilde{\beta}_{\mathbf{k},j}^{*2}\}$  for some constant  $c_1 > 0$ , completing the proof of the lower bound.

We now establish the upper bound by showing that  $g_2(\tilde{\beta}_{\mathbf{k},j}) \leq Q_{\mathbf{k},j}^U$  for all  $j = 1, \dots, |\mathbf{k}|$ . It is straightforward to see that  $g_2$  is a symmetric function (i.e,  $g_2(\tilde{\beta}_{\mathbf{k},j}) = g_2(|\tilde{\beta}_{\mathbf{k},j}|)$ ), so that it is enough to establish the bound for  $\tilde{\beta}_{\mathbf{k},j} > 0$ ; without loss of generality we assume that  $\tilde{\beta}_{\mathbf{k},j} > 0$ . We have

$$\begin{aligned} &\int_{-\infty}^{\infty} \exp\{-T_{2n}^2(\beta_{\mathbf{k},j} - \tilde{\beta}_{\mathbf{k},j})^2/2 - \tau_{n,p}/\beta_{\mathbf{k},j}^2\} d\beta_{\mathbf{k},j} \\ &= \int_{-\infty}^0 \exp\{-T_{2n}^2(\beta_{\mathbf{k},j} - \tilde{\beta}_{\mathbf{k},j})^2/2 - \tau_{n,p}/\beta_{\mathbf{k},j}^2\} d\beta_{\mathbf{k},j} \\ &+ \int_0^{\tilde{\beta}_{\mathbf{k},j}+\tilde{\epsilon}_n} \exp\{-T_{2n}^2(\beta_{\mathbf{k},j} - \tilde{\beta}_{\mathbf{k},j})^2/2 - \tau_{n,p}/\beta_{\mathbf{k},j}^2\} d\beta_{\mathbf{k},j} \\ &+ \int_{\tilde{\beta}_{\mathbf{k},j}+\tilde{\epsilon}_n}^{\infty} \exp\{-T_{2n}^2(\beta_{\mathbf{k},j} - \tilde{\beta}_{\mathbf{k},j})^2/2 - \tau_{n,p}/\beta_{\mathbf{k},j}^2\} d\beta_{\mathbf{k},j}. \end{aligned}$$

Define the first term of the above as  $W_1$ , the second as  $W_2$ , and the third term as  $W_3$ . First, we shall show that  $W_1 \leq cT_{2n}^{-1} \exp\{-T_{2n}(2\tau_{n,p})^{1/2}\}$  for some positive constant  $c$ . By transforming

the variable  $t = \beta_{\mathbf{k},j} - \tilde{\beta}_{\mathbf{k},j}$ ,

$$\begin{aligned} W_1 &= \int_{-\infty}^0 \exp\{-T_{2n}^2 t^2/2 + T_{2n}^2 t \tilde{\beta}_{\mathbf{k},j} - T_{2n}^2 \tilde{\beta}_{\mathbf{k},j}^2/2 - \tau_{n,p}/t^2\} dt \\ &\leq \int_{-\infty}^0 \exp\{-T_{2n}^2 t^2/2 - \tau_{n,p}/t^2\} dt \\ &\leq c_3 T_{2n}^{-1} \exp\{-T_{2n}(2\tau_{n,p})^{1/2}\}, \end{aligned}$$

for some constant  $c_3$ , since  $\int \exp\{-\mu/t^2 - \zeta t^2\} dt = (\pi/\zeta)^{-1/2} \exp\{-2(\mu\zeta)^{1/2}\}$  for  $\mu > 0$  and  $\zeta > 0$ .

Second, by changing the variable  $z = t - \tilde{\epsilon}$ ,

$$\begin{aligned} W_2 &= \int_{-\tilde{\epsilon}_n}^{\tilde{\beta}_{\mathbf{k},j}} \exp\{-T_{2n}^2 (z - \tilde{\beta}_{\mathbf{k},j} + \tilde{\epsilon}_n)^2/2 - \tau_{n,p}/(z + \tilde{\epsilon}_n)^2\} dz \\ &\leq \exp\{-\tau_{n,p}/(\tilde{\beta}_{\mathbf{k},j} + \tilde{\epsilon}_n)^2\} \int_{-\infty}^{\infty} \exp\{-T_{2n}^2 (z - \tilde{\beta}_{\mathbf{k},j} + \tilde{\epsilon}_n)^2/2\} dz \\ &\leq c_4 T_{2n}^{-1} \exp\{-\tau_{n,p}/(\tilde{\beta}_{\mathbf{k},j} + \tilde{\epsilon}_n)^2\}, \end{aligned}$$

for some positive constant  $c_4$ .

Third, by changing the variable  $z = t - \tilde{\beta}_{\mathbf{k},j}$ , there exists some positive constant  $c$  such that

$$\begin{aligned} W_3 &= \int_{\tilde{\epsilon}_n}^{\infty} \exp\{-T_{2n}^2 z^2/2 - \tau_{n,p}/(z + \tilde{\beta}_{\mathbf{k},j})^2\} dz \\ &\leq \exp\{-T_{2n}^2 \tilde{\epsilon}_n^2/4\} \int_{-\infty}^{\infty} \exp\{-T_{2n}^2 z^2/4\} dz \\ &\leq c_5 T_{2n}^{-1} \exp\{-c_6 T_{2n} \tau_{n,p}^{1/2}\}, \end{aligned}$$

for some constants  $c_5$  and  $c_6$ , since  $\tilde{\epsilon}_n \asymp (n\nu_{\mathbf{k}^*}/\tau_{n,p})^{-1/4}$ . Then,

$$\begin{aligned} g_2(\tilde{\beta}_{\mathbf{k},j}) &\leq c_3 T_{2n}^{-1} \exp\{-T_{2n}(2\tau_{n,p})^{1/2}\} + c_4 T_{2n}^{-1} \exp\{-\tau_{n,p}/(\tilde{\beta}_{\mathbf{k},j} + \tilde{\epsilon}_n)^2\} \\ &\quad + c_5 T_{2n}^{-1} \exp\{-c_6 T_{2n} \tau_{n,p}^{1/2}\}. \end{aligned}$$

Since  $\tilde{\epsilon}_n \asymp (n\nu_{\mathbf{k}^*}/\tau_{n,p})^{-1/4}$ , when  $\tilde{\beta}_{\mathbf{k},j} < \tilde{\epsilon}_n$ ,  $\tau_{n,p}/(\tilde{\beta}_{\mathbf{k},j} + \tilde{\epsilon}_n)^2 < \tau_{n,p}/(4\tilde{\epsilon}_n^2) \asymp T_{2n} \tau_{n,p}^{1/2}$ , and

when  $\tilde{\beta}_{\mathbf{k},j} \geq \tilde{\epsilon}_n$ ,  $\tau_{n,p}/(\tilde{\beta}_{\mathbf{k},j} + \tilde{\epsilon}_n)^2 \leq \tau_{n,p}/(4\tilde{\beta}_{\mathbf{k},j}^2) < T_{2n}\tau_{n,p}^{1/2}$ . In overall, the right-hand side of the above display would be dominated by the second term, which shows that  $g_2(\tilde{\beta}_{\mathbf{k},j}) \leq cT_{2n}^{-1} \exp\{-\tau_{n,p}/(\tilde{\beta}_{\mathbf{k},j} + \tilde{\epsilon}_n)^2\}$  for some constant  $c$ . When  $\tilde{\beta}_{\mathbf{k},j} < 0$ , we can show the same result by following exactly the same steps explained above.  $\square$

We now present some auxiliary results that are used to prove Theorems 1 and 2. We make use of the following simple union bound multiple times: for non-negative random variables  $V_1, \dots, V_m$  and  $a > 0$ ,

$$P\left(\sum_{l=1}^m V_l > a\right) \leq \sum_{l=1}^m P(V_l > a/m) \leq m \max_{1 \leq l \leq m} P(V_l > a/m). \quad (\text{S3})$$

We define some notations that are used in the subsequent proofs. Let  $\mathbf{t}$  denote the true data generating model, and let  $\beta_{\mathbf{t}}^0$  denote the true regression coefficient corresponding to  $\mathbf{t}$ . Let  $\mathbf{c}_{\mathbf{t}} = \mathbf{t} \setminus \mathbf{k}$ ,  $\mathbf{c}_{\mathbf{k}} = \mathbf{k} \setminus \mathbf{t}$ , and  $\mathbf{u} = \mathbf{k} \cup \mathbf{t}$ . Also, we define the cardinality of a model  $\mathbf{k}$  as  $k$  and in the same spirit, denote  $c_{\mathbf{k}} = |\mathbf{c}_{\mathbf{k}}|$ ,  $c_{\mathbf{t}} = |\mathbf{c}_{\mathbf{t}}|$ , and  $t = |\mathbf{t}|$ .  $\{x\}_j$  denotes the  $j$ -th element of the vector  $x$ , and  $\text{diag}\{A\}_j$  refers to the  $j$ -th diagonal element in the square matrix  $A$ . We denote  $\chi_m^2(\lambda)$  a non-central chi-square distribution with the degrees of freedom  $m$  and non-centrality parameter  $\lambda$ ; a central chi-square distribution is simply denoted by  $\chi_m^2$ .

An important property that is used in the subsequent proofs concerns the distribution of the marginal ridge estimator. Let  $\tilde{\beta}_{\mathbf{k}} = (X_{\mathbf{k}}^T X + 1/\tau_{n,p} I_{\mathbf{k}})^{-1} X_{\mathbf{k}}^T y$  and  $\tilde{\beta}_{\mathbf{k},j} = \{\tilde{\beta}_{\mathbf{k}}\}_j$ . Then,

$$\tilde{\beta}_{\mathbf{k},j} \sim N(\beta_{\mathbf{k},j}^*, \sigma_{\mathbf{k},j}^{2*}), \quad (\text{S4})$$

where  $\beta_{\mathbf{k},j}^* = \{(X_{\mathbf{k}}^T X + 1/\tau_{n,p} I_{\mathbf{k}})^{-1} X_{\mathbf{k}}^T X_{\mathbf{t}} \beta_{\mathbf{t}}^*\}_j$  and  $\sigma_{\mathbf{k},j}^{2*} = \sigma^2 \text{diag}\{(X_{\mathbf{k}}^T X_{\mathbf{k}} + 1/\tau_{n,p} I_{\mathbf{k}})^{-1}\}_j$ . It is also evident that  $(\tilde{\beta}_{\mathbf{k},j} - \beta_{\mathbf{k},j}^*)^2 / \sigma_{\mathbf{k},j}^{2*} \sim \chi_1^2$ .

A set of technical results follow that are used in the proof of the main results. Define

$$H_{1n} = \sum_{\substack{\mathbf{k}: \mathbf{t} \subseteq \mathbf{k}, \\ |\mathbf{k}| \leq q_n}} \frac{m_{\mathbf{k}}(y)\pi(\mathbf{k})}{m_{\mathbf{t}}(y)\pi(\mathbf{t})} = \sum_{\substack{\mathbf{k}: \mathbf{t} \subseteq \mathbf{k}, \\ |\mathbf{k}| \leq q_n}} \frac{\pi(\mathbf{k} | y)}{\pi(\mathbf{t} | y)}, \quad H_{2n} = \sum_{\substack{\mathbf{k}: \mathbf{t} \not\subseteq \mathbf{k}, \\ |\mathbf{k}| \leq q_n}} \frac{m_{\mathbf{k}}(y)\pi(\mathbf{k})}{m_{\mathbf{t}}(y)\pi(\mathbf{t})} = \sum_{\substack{\mathbf{k}: \mathbf{t} \not\subseteq \mathbf{k}, \\ |\mathbf{k}| \leq q_n}} \frac{\pi(\mathbf{k} | y)}{\pi(\mathbf{t} | y)}. \quad (\text{S5})$$

**Lemma 2.** Fix  $\epsilon > 0$ . Let  $\Gamma_d = \{\mathbf{k} : |\mathbf{k}| \leq q_n, \mathbf{t} \subsetneq \mathbf{k}, |\mathbf{k}| - |\mathbf{t}| = d\}$  for  $d = 1, \dots, q_n - |\mathbf{t}|$ . Suppose there exist constants  $c, \delta > 0$  such that  $\max_{\mathbf{k} \in \Gamma_d} P\{\pi(\mathbf{k} | y)/\pi(\mathbf{t} | y) > \epsilon p^{-d}/q_n\} \leq cp^{-d(1+\delta)}$  for  $d = 1, \dots, q_n - |\mathbf{t}|$ . Then,  $H_{1n}$  converges to zero in probability as  $n$  tends to  $\infty$ , where  $H_{1n}$  is as in (S5).

*Proof.* Clearly,  $|\Gamma_d| = \binom{p-|\mathbf{t}|}{d}$ . Using (S3), we bound

$$\begin{aligned} P\left\{\sum_{\mathbf{k}: \mathbf{t} \subsetneq \mathbf{k}} \frac{\pi(\mathbf{k} | y)}{\pi(\mathbf{t} | y)} > \epsilon\right\} &= P\left\{\sum_{d=1}^{q_n-|\mathbf{t}|} \sum_{\mathbf{k} \in \Gamma_d} \frac{\pi(\mathbf{k} | y)}{\pi(\mathbf{t} | y)} > \epsilon\right\} \\ &\leq \sum_{d=1}^{q_n-|\mathbf{t}|} P\left\{\sum_{\mathbf{k} \in \Gamma_d} \frac{\pi(\mathbf{k} | y)}{\pi(\mathbf{t} | y)} > \epsilon/q_n\right\} \\ &\leq \sum_{d=1}^{q_n-|\mathbf{t}|} \binom{p-|\mathbf{t}|}{d} \max_{\mathbf{k} \in \Gamma_d} P\left\{\frac{\pi(\mathbf{k} | y)}{\pi(\mathbf{t} | y)} > \epsilon p^{-d}/q_n\right\} \leq \sum_{d=1}^{q_n-|\mathbf{t}|} cp^{-d\delta}. \end{aligned}$$

Finally,  $\sum_{d=1}^{q_n-|\mathbf{t}|} cp^{-d\delta} \leq cq_n p^{-\delta} \rightarrow 0$  as  $n \rightarrow \infty$ . □

**Lemma 3.** Fix  $\epsilon > 0$  and let  $t = |\mathbf{t}|$ . Define  $\Gamma_{k, c_k, c_t} = \{\mathbf{k} : |\mathbf{k}| \leq q_n, |\mathbf{k}| = k, |\mathbf{k} \setminus \mathbf{t}| = c_k, |\mathbf{t} \setminus \mathbf{k}| = c_t\}$  for  $k = 0, \dots, q_n$ ;  $c_k = 0, \dots, k$ ;  $c_t = 1, \dots, t$ . Suppose

$$\max_{\mathbf{k} \in \Gamma_{k, c_k, c_t}} P\left[\frac{\pi(\mathbf{k} | y)}{\pi(\mathbf{t} | y)} > \epsilon n^{-3} p^{-k} n^{-c_k} t^{-t}\right] \leq cp^{-k(1+\delta)},$$

with some positive constants  $c$  and  $\delta$ . Then,  $H_{2n}$  converges to zero as  $n$  tends to  $\infty$ , where  $H_{2n}$  is as in (S5).

*Proof.* Clearly,  $|\Gamma_{k,c_k,c_t}| = \binom{p}{k} \binom{k}{c_k} \binom{t}{c_t}$ .

$$\begin{aligned}
P\left\{\sum_{\mathbf{k}:\mathbf{t}\not\subseteq\mathbf{k}}\frac{\pi(\mathbf{k}|y)}{\pi(\mathbf{t}|y)}>\epsilon\right\} &\leq P\left\{\sum_{k=1}^{q_n}\sum_{c_k=0}^k\sum_{c_t=1}^t\sum_{\mathbf{k}\in\Gamma_{k,c_k,c_t}}\frac{\pi(\mathbf{k}|y)}{\pi(\mathbf{t}|y)}>\epsilon\right\} \\
&\leq P\left\{\sum_{k=1}^{q_n}\sum_{c_k=0}^k\sum_{c_t=1}^t\sum_{\mathbf{k}\in\Gamma_{k,c_k,c_t}}\frac{\pi(\mathbf{k}|y)}{\pi(\mathbf{t}|y)}>\epsilon\right\} \\
&\leq\sum_{k=1}^{q_n}\sum_{c_k=0}^k\sum_{c_t=1}^tP\left\{\sum_{\mathbf{k}\in\Gamma_{k,c_k,c_t}}\frac{\pi(\mathbf{k}|y)}{\pi(\mathbf{t}|y)}>\epsilon n^{-3}\right\} \\
&\leq\sum_{k=1}^{q_n}\sum_{c_k=0}^k\sum_{c_t=1}^tp^kn^{c_k}t^t\max_{\mathbf{k}\in\Gamma_{k,c_k,c_t}}P\left\{\frac{\pi(\mathbf{k}|y)}{\pi(\mathbf{t}|y)}>\epsilon n^{-3}p^{-k}n^{-c_k}t^{-t}\right\} \\
&\leq\sum_{k=1}^{q_n}\sum_{c_k=0}^k\sum_{c_t=1}^tp^kn^{c_k}t^tp^{-k(1+\delta)}\rightarrow 0,
\end{aligned}$$

as  $n \rightarrow \infty$ . □

**Lemma 4.** Suppose  $W$  follows a non-central chi-square distribution with the degree of freedom  $m_n$  that is a positive integer and the non-central parameter  $\lambda_n \geq 0$ , i.e,  $W \sim \chi_{m_n}^2(\lambda_n)$ . Also, consider  $w_n$  and  $t_n$  such that  $w_n \rightarrow 0$  and  $t_n \rightarrow \infty$  as  $n$  tends to  $\infty$ . Also, assume that  $m_n \prec t_n$ . Then,

$$P(W \leq \lambda_n w_n) \leq c_1 \lambda_n^{-1} \exp\{-\lambda_n(1 - w_n)^2\}, \quad (\text{S6})$$

And

$$P(W > \lambda_n + t_n) \leq c_2 \left(\frac{t_n}{2m_n}\right)^{m_n/2} \exp\{m_n/2 - t_n/2\} + c_3 \lambda_n^{1/2} t_n^{-1} \exp\left\{-\frac{t_n^2}{32\lambda_n}\right\}, \quad (\text{S7})$$

where  $c_1$ ,  $c_2$ , and  $c_3$  are some positive constants.

*Proof.*  $W$  can be expressed as  $W = \sum_{i=1}^{m_n} \{Z_i + (\lambda_n/m_n)^{1/2}\}^2$ , where  $Z_i \stackrel{i.i.d}{\sim} N(0, 1)$  for  $i = 1, \dots, m$ . Then, by the fact that  $P(Z > a) \leq (2\pi)^{-1/2} a^{-1} \exp\{-a^2/2\}$  for any  $a > 0$ , we can

show that there exist some positive constants  $c_1$  such that

$$\begin{aligned}
P(W \leq \lambda_n w_n) &= P\left\{\sum_{i=1}^{m_n} Z_i^2 + 2(\lambda_n/m_n)^{1/2} \sum_{i=1}^{m_n} Z_i + \lambda_n \leq \lambda_n w_n\right\} \\
&\leq P\left\{m_n^{-1/2} \sum_{i=1}^{m_n} Z_i \leq -\lambda_n^{1/2}(1-w_n)/2\right\} \\
&= P\{|Z_1| \geq \lambda_n^{1/2}(1-w_n)/2\}/2 \\
&\leq c_1 \lambda_n^{-1} \exp\{-\lambda_n(1-w_n)^2/2\},
\end{aligned}$$

since  $Z_1$  follows a standard normal distribution.

Also, by using Chernoff's bound and the fact that  $P(Z > a) \leq (2\pi)^{-1/2} a^{-1} \exp\{-a^2/2\}$  for any  $a > 0$ , one can show that

$$\begin{aligned}
P(W > \lambda_n + t_n) &= P\left\{\sum_{i=1}^{m_n} Z_i^2 + 2(\lambda_n/m_n)^{1/2} \sum_{i=1}^{m_n} Z_i > t_n\right\} \\
&\leq P\left(\sum_{i=1}^{m_n} Z_i^2 > t_n/2\right) + P\left\{m_n^{-1/2} \sum_{i=1}^{m_n} Z_i > \lambda_n^{-1/2} t_n/4\right\} \\
&\leq c_2 \left(\frac{t_n}{2m_n}\right)^{m_n/2} \exp\{m_n/2 - t_n/2\} + c_3 \lambda_n^{1/2} t_n^{-1} \exp\left\{-\frac{t_n^2}{32\lambda_n}\right\},
\end{aligned}$$

where  $c_2$  and  $c_3$  are some positive constants. □

**Lemma 5.** Consider  $Q_{\mathbf{k}}$  defined in (6) for an arbitrary model  $\mathbf{k}$ . Fix any  $\delta > 0$ . For any  $\mathbf{k}$  with  $\mathbf{t} \subsetneq \mathbf{k}$ ,

$$P[Q_{\mathbf{k}}/Q_{\mathbf{t}} > \exp\{-|\mathbf{k} \setminus \mathbf{t}| \tau_{n,p}^{2/3} (n\nu_{\mathbf{k}^*})^{1/3} + |\mathbf{t}| \tau_{n,p}^{1-\delta/8} (n\nu_{\mathbf{k}^*})^{\delta/8}\}] \leq p^{-|\mathbf{k} \setminus \mathbf{t}|(1+\delta)}, \quad (\text{S8})$$

and for  $\mathbf{k}$  such that  $\mathbf{t} \not\subseteq \mathbf{k}$ ,

$$P[Q_{\mathbf{k}}/Q_{\mathbf{t}} > \exp\{\|\beta_{\mathbf{t}}^0\|_2^2 n\nu_{\mathbf{u}^*} / \{2 \log(\tau_{n,p}/\log p)\}\}] \leq p^{-|\mathbf{k}|(1+\delta)}. \quad (\text{S9})$$

*Proof.* By Lemma 1, it is sufficient to show that

$$\begin{aligned} & P \left[ \prod_{j \in \mathbf{t}} (Q_{\mathbf{k},j}^U / Q_{\mathbf{t},j}^L) > \exp\{|\mathbf{t}| \tau_{n,p}^{1-\delta/8} (n\nu_{\mathbf{k}^*})^{\delta/8}\} \right] + P \left[ \prod_{j \in \mathbf{k} \setminus \mathbf{t}} Q_{\mathbf{k},j}^U > \exp\{-|\mathbf{k} \setminus \mathbf{t}| \tau_{n,p}^{2/3} (n\nu_{\mathbf{k}^*})^{1/3}\} \right] \\ & \leq p^{-|\mathbf{k} \setminus \mathbf{t}|(1+\delta)}. \end{aligned} \quad (\text{S10})$$

We first shall show that the first term in the left-hand side of (S10) is bounded above by  $\exp\{-cn\nu_{\mathbf{k}^*}\}$  for some constant  $c$ .

$$\begin{aligned} & P \left[ \prod_{j \in \mathbf{t}} \frac{Q_{\mathbf{k},j}^U}{Q_{\mathbf{t},j}^L} > \exp\{|\mathbf{t}| \tau_{n,p}^{1-\delta/8} (n\nu_{\mathbf{k}^*})^{\delta/8}\} \right] \leq \sum_{j \in \mathbf{t}} P \left[ \frac{Q_{\mathbf{k},j}^U}{Q_{\mathbf{t},j}^L} > \exp\{\tau_{n,p}^{1-\delta/8} (n\nu_{\mathbf{k}^*})^{\delta/8}\} \right] \\ & = \sum_{j \in \mathbf{t}} P \left[ c' \left( \frac{n\nu_{\mathbf{k}^*} + 1/\tau_{n,p}}{n\nu_{\mathbf{t}}^* + 1/\tau_{n,p}} \right)^{-1/2} \exp\left\{-\tau_{n,p} \left( 1/(|\tilde{\beta}_{\mathbf{k},j}| + \tilde{\epsilon}_n)^2 - 1/\tilde{\beta}_{\mathbf{k},j}^{*2} \right)\right\} > \exp\{\tau_{n,p}^{1-\delta/8} (n\nu_{\mathbf{k}^*})^{\delta/8}\} \right] \\ & \leq \sum_{j \in \mathbf{t}} P[|\tilde{\beta}_{\mathbf{k},j} - \beta_{\mathbf{k},j}^*| > \epsilon'] + \sum_{j \in \mathbf{t}} P[|\tilde{\beta}_{\mathbf{t},j} - \beta_{\mathbf{t},j}^*| > \epsilon'], \end{aligned} \quad (\text{S11})$$

for some small enough  $\epsilon' > 0$  and some positive constant  $c'$  and  $\tilde{\beta}_{\mathbf{k},j} \in [\tilde{\beta}_{\mathbf{k},j} - \tilde{\epsilon}_n, \tilde{\beta}_{\mathbf{k},j} + \tilde{\epsilon}_n] \setminus (-\tilde{\epsilon}_n, \tilde{\epsilon}_n)^c$  as defined in Lemma 1, and  $\tilde{\beta}_{\mathbf{k},j}$  and  $\beta_{\mathbf{k},j}^*$  defined in (S4). The last inequality in the above display asymptotically holds, since

$$\tau_{n,p}^{1-\delta/8} (n\nu_{\mathbf{k}^*})^{\delta/8} \succ \tau_{n,p} / (|\beta_{\mathbf{k},j}^*| - \epsilon' - \tilde{\epsilon}_n)^2,$$

for any  $\delta > 0$ .

Since  $(\tilde{\beta}_{\mathbf{k},j} - \beta_{\mathbf{k},j}^*)^2 / \sigma_{\mathbf{k},j}^{*2} \sim \chi_1^2$  and  $\sigma_{\mathbf{k},j}^{*2} \geq (n\nu_{\mathbf{k}^*} + 1/\tau_{n,p})^{-1}$ , by using Lemma 4, one can show that the first term in (S11) bounded above by  $\exp\{-c_1 \epsilon'^2 n\nu_{\mathbf{k}^*}\}$  for some constant  $c_1$ . Similarly, the second term in (S11) is bounded above by  $\exp\{-c_2 \epsilon'^2 n\}$  for some constant  $c_2$ , since *Assumption 5* states that  $X_{\mathbf{t}}^T X_{\mathbf{t}} / n$  is asymptotically isotropic. Therefore, (S11) is asymptotically bounded by  $p^{-qn(1+\delta)}$  by *Assumption 3*.

Next, we shall show that the second term in the left-hand side of (S10) is bounded above by

$\exp\{-c\tau_{n,p}^{1/3}(n\nu_{\mathbf{k}^*})^{2/3}\}$  for some positive constant  $c$ . Since when  $j \in \mathbf{k} \setminus \mathbf{t}$  and  $\mathbf{t} \subsetneq \mathbf{k}$ ,  $\beta_{\mathbf{k},j}^* \asymp n^{-1}$ ,

$$\begin{aligned}
& P \left[ \prod_{j \in \mathbf{k} \setminus \mathbf{t}} Q_{\mathbf{k},j}^U > \exp\{-|\mathbf{k} \setminus \mathbf{t}| \tau_{n,p}^{2/3} (n\nu_{\mathbf{k}^*})^{1/3}\} \right] \\
& \leq \sum_{j \in \mathbf{k} \setminus \mathbf{t}} P \left[ c'(n\nu_{\mathbf{k},j} + 1/\tau_{n,p})^{-1/2} \exp \left\{ -\frac{\tau_{n,p}}{(|\tilde{\beta}_{\mathbf{k},j}| + \tilde{\epsilon}_n)^2} \right\} > \exp\{-\tau_{n,p}^{2/3} (n\nu_{\mathbf{k}^*})^{1/3}\} \right] \\
& = \sum_{j \in \mathbf{k} \setminus \mathbf{t}} P \left[ \tilde{\beta}_{\mathbf{k},j}^2 > \left\{ \tau_{n,p}^{1/2} ((n\nu_{\mathbf{k}^*})^{1/3} \tau_{n,p}^{2/3} - \log(n\nu_{\mathbf{k}^*} + 1/\tau_{n,p})/2 + \log c')^{-1/2} - \tilde{\epsilon}_n \right\}^2 \right] \\
& \leq \sum_{j \in \mathbf{k} \setminus \mathbf{t}} P \left[ (\tilde{\beta}_{\mathbf{k},j} - \beta_{\mathbf{k},j}^*)^2 / \sigma_{\mathbf{k},j}^* > c'' \left( \frac{\tau_{n,p}}{n\nu_{\mathbf{k}^*}} \right)^{1/3} (n\nu_{\mathbf{k}^*} + 1/\tau_{n,p}) / \sigma^2 \right],
\end{aligned}$$

for some positive constant  $c'$  and  $c''$ . Since  $(\tilde{\beta}_{\mathbf{k},j} - \beta_{\mathbf{k},j}^*)^2 / \sigma_{\mathbf{k},j}^* \sim \chi_1^2$ , by Lemma 4 the last quantity in the above display can be bounded by  $\exp\{-c\tau_{n,p}^{1/3}(n\nu_{\mathbf{k}^*})^{2/3}\}$  for some constant  $c$ . By *Assumption 3*,  $\exp\{-c\tau_{n,p}^{1/3}(n\nu_{\mathbf{k}^*})^{2/3}\} \prec p^{-q_n(1+\delta)} \leq p^{|\mathbf{k} \setminus \mathbf{t}|(1+\delta)}$ , which proves the statement (S10).

We now shall show that the equation (S9) holds for any  $\delta > 0$ . The left-hand side of (S9) can be bounded above by

$$\begin{aligned}
& P \left[ \prod_{j \in \mathbf{k}} Q_{\mathbf{k},j}^U \left( \prod_{j \in \mathbf{t}} Q_{\mathbf{t},j}^L \right)^{-1} > \exp \left\{ \|\beta_{\mathbf{t}}^0\|_2^2 n\nu_{\mathbf{u}^*} / \{2 \log(\tau_{n,p} / \log p)\} \right\} \right] \\
& \leq \sum_{j \in \mathbf{k}} P \left[ c(n\nu_{\mathbf{k}^*} + 1/\tau_{n,p})^{-1/2} \exp \left\{ -\tau_{n,p} / (|\tilde{\beta}_{\mathbf{k},j}| + \tilde{\epsilon}_n)^2 \right\} > \exp \left\{ \|\beta_{\mathbf{t}}^0\|_2^2 n\nu_{\mathbf{u}^*} / \{4|\mathbf{k}| \log(\tau_{n,p} / \log p)\} \right\} \right] \\
& \quad + \sum_{j \in \mathbf{t}} P \left[ c'(n\nu_{\mathbf{t}^*} + 1/\tau_{n,p})^{1/2} \exp \left\{ \tau_{n,p} / (\tilde{\beta}_{\mathbf{t},j}^*)^2 \right\} > \exp \left\{ \|\beta_{\mathbf{t}}^0\|_2^2 n\nu_{\mathbf{u}^*} / \{4|\mathbf{t}| \log(\tau_{n,p} / \log p)\} \right\} \right] \\
& \leq \sum_{j \in \mathbf{k}} P \left[ -\frac{\tau_{n,p}}{(|\tilde{\beta}_{\mathbf{k},j}| + \tilde{\epsilon}_n)^2} > \|\beta_{\mathbf{t}}^0\|_2^2 n\nu_{\mathbf{u}^*} / \{4|\mathbf{k}| \log(\tau_{n,p} / \log p)\} + \log c \right] \tag{S12} \\
& \quad + \sum_{j \in \mathbf{t}} P \left[ |\tilde{\beta}_{\mathbf{t},j}^*| < c'' \|\beta_{\mathbf{t}}^0\|_2^{-1} (n\nu_{\mathbf{u}^*})^{-1/2} \{4|\mathbf{t}| \log(\tau_{n,p} / \log p)\}^{1/2} \tau_{n,p}^{-1/2} \right], \tag{S13}
\end{aligned}$$

where  $c$ ,  $c'$ , and  $c''$  are some positive constants.

(S12) is always zero since the left-hand side in the probability is always negative and the right-hand side in the probability operator is always positive. So, we focus on (S13) as below:

Since  $\tilde{\beta}_{\mathbf{t},j} - \tilde{\epsilon}_n \leq \tilde{\beta}_{\mathbf{t},j}^* \leq \tilde{\beta}_{\mathbf{t},j} + \tilde{\epsilon}_n$  implies  $|\tilde{\beta}_{\mathbf{t},j}| - \tilde{\epsilon}_n \leq |\tilde{\beta}_{\mathbf{t},j}^*| \leq |\tilde{\beta}_{\mathbf{t},j}| + \tilde{\epsilon}_n$ , (S13) can be

bounded above by

$$\begin{aligned} & \sum_{j \in \mathbf{t}} P \left[ |\tilde{\beta}_{\mathbf{t},j}^*| < c'' \|\beta_{\mathbf{t}}^0\|_2^{-1} (n\nu_{\mathbf{u}^*})^{-1/2} \{4|\mathbf{t}| \log(\tau_{n,p}/\log p)\}^{1/2} \tau_{n,p}^{1/2} \right] \\ & \leq \sum_{j \in \mathbf{t}} P \left[ |\tilde{\beta}_{\mathbf{t},j}| < c'' \|\beta_{\mathbf{t}}^0\|_2^{-1} (n\nu_{\mathbf{u}^*})^{-1/2} \{4|\mathbf{t}| \log(\tau_{n,p}/\log p)\}^{1/2} \tau_{n,p}^{1/2} + \tilde{\epsilon}_n \right], \end{aligned}$$

where  $\beta_{\mathbf{t},j}^*$  is defined in (S4). Since  $\tilde{\beta}_{\mathbf{t},j}^2/\sigma_{\mathbf{t},j}^2 \sim \chi_1^2(\beta_{\mathbf{t},j}^{*2}/\sigma_{\mathbf{t},j}^2)$  and  $\sigma_{\mathbf{t},j}^2 \asymp \sigma^2/n$  for  $j \in \mathbf{t}$ , by using Lemma 4 and Assumption 5, one can show that the probability is bounded by  $\exp\{-cn\}$  for some constant  $c$ , and it is evident that  $\exp\{-cn\} \prec p^{-|\mathbf{k}|(1+\delta)}$ , which completes the proof of the Lemma.  $\square$

## 2 Proofs of Main Results

**Proof of Theorem 1.** We have  $\pi(\mathbf{t} | \mathbf{y}) = \mathbf{m}_{\mathbf{t}}(\mathbf{y})\pi(\mathbf{t})/\{\sum_{\mathbf{k}:|\mathbf{k}|\leq q_n} \mathbf{m}_{\mathbf{k}}(\mathbf{y})\pi(\mathbf{k})\}$ , since  $\pi(\mathbf{k}) = 0$  for any  $\mathbf{k}$  with  $|\mathbf{k}| > q_n$ . Recall  $H_{1n}$  and  $H_{2n}$  from (S5) and note that  $\pi(\mathbf{t} | \mathbf{y}) = (1 + H_{1n} + H_{2n})^{-1}$ . Hence to show that  $\pi(\mathbf{t} | \mathbf{y})$  converges to one in probability, it is sufficient to establish that  $H_{1n}$  and  $H_{2n}$  both converge in probability to zero as  $n$  tends to  $\infty$ . We shall prove the Theorem by showing:

For any  $\delta \in (0, 8/3)$  and any model  $\mathbf{k} \in \Gamma_d$  (defined in Lemma 2),

$$P \left[ \frac{\pi(\mathbf{k} | \mathbf{y})}{\pi(\mathbf{t} | \mathbf{y})} > \epsilon p^{-d} q_n^{-1} \right] \leq p^{-d(1+\delta)}, \quad (\text{S14})$$

and for any model  $\mathbf{k} \in \Gamma_{k,c_k,c_t}$  (defined in Lemma 3),

$$P \left[ \frac{\pi(\mathbf{k} | \mathbf{y})}{\pi(\mathbf{t} | \mathbf{y})} > \epsilon n^{-3} p^{-k} n^{-c_k} t^{-t} \right] \leq c p^{-k(1+\delta)}. \quad (\text{S15})$$

Then, it is evident that  $H_{1n}$  and  $H_{2n}$  both converge to zero in probability by Lemma 2 and 3 respectively.

First, we shall show that (S14) holds. For any  $\mathbf{k} \in \Gamma_d$ , recall that

$$P\left[\frac{\pi(\mathbf{k} | y)}{\pi(\mathbf{t} | y)} > \epsilon p^{-d} q_n^{-1}\right] \leq P\left[C_{n,p}^{-d} \frac{Q_{\mathbf{k}}}{Q_{\mathbf{t}}} \exp\left\{-\frac{1}{2\sigma^2}(\tilde{R}_{\mathbf{k}} - \tilde{R}_{\mathbf{t}})\right\} > \epsilon p^{-d}/q_n\right].$$

Since  $\tilde{R}_{\mathbf{k}} > R_{\mathbf{k}}^*$  and  $\tilde{R}_{\mathbf{t}} < R_{\mathbf{t}}^* + \eta$ , where  $\eta = d_1 \hat{\beta}_{\mathbf{t}}^T \hat{\beta}_{\mathbf{t}} / \tau_{n,p}$  for some constant  $d_1$  and  $\hat{\beta}_{\mathbf{t}}$  is the ordinary least square estimator of  $\beta_{\mathbf{t}}$  in the true model  $\mathbf{t}$ , by using (S3), the term in the last display can be bounded above by

$$\begin{aligned} & P\left[C_{n,p}^{-d} \frac{Q_{\mathbf{k}}}{Q_{\mathbf{t}}} \exp\left\{-\frac{(R_{\mathbf{k}}^* - R_{\mathbf{t}}^*)}{2\sigma^2} + \frac{\eta}{2\sigma^2}\right\} > \epsilon p^{-d}/q_n\right] \\ \leq & P\left[C_{n,p}^{-d} \frac{Q_{\mathbf{k}}}{Q_{\mathbf{t}}} p^{d(1+\delta)+\delta} > \epsilon p^{-d}/q_n\right] \end{aligned} \quad (\text{S16})$$

$$+ P\left[R_{\mathbf{t}}^* - R_{\mathbf{k}}^* > 2\sigma^2 d(1+\delta) \log p\right] \quad (\text{S17})$$

$$+ P\left[\exp\{\eta/(2\sigma^2)\} > \epsilon p^\delta\right]. \quad (\text{S18})$$

By using Lemma 5, (S16) is less than  $p^{-d(1+\delta)}$  when  $\delta < 8/3$ . Since  $(R_{\mathbf{t}}^* - R_{\mathbf{k}}^*)/\sigma^2 \sim \chi_{|\mathbf{k} \setminus \mathbf{t}|}^2$ , by using (S6) in Lemma 4, we can show that (S17) is bounded by  $c p^{-d(1+\delta)}$  for some positive constant  $c$ . Since  $\tau_{n,p} n \nu_{\mathbf{t}^*} \eta / d_1 \sigma^2 \leq \hat{\beta}_{\mathbf{t}}^T X_{\mathbf{t}}^T X_{\mathbf{t}} \hat{\beta}_{\mathbf{t}} / \sigma^2 \sim \chi_{|\mathbf{t}|}^2 (\beta_{\mathbf{t}}^{0T} X_{\mathbf{t}}^T X_{\mathbf{t}} \beta_{\mathbf{t}}^0)$ , by using the inequality (S7) in Lemma 4, (S18) can be expressed as

$$\begin{aligned} P\left[\exp\{\eta/2\sigma^2\} > \epsilon p^\delta\right] & \leq P\left[\tau_{n,p} n \nu_{\mathbf{t}^*} \eta / d_1 \sigma^2 > 2\tau_{n,p} n \nu_{\mathbf{t}^*} (\log \epsilon + \delta \log p) / d_1\right] \\ & \leq P\left[\hat{\beta}_{\mathbf{t}}^T X_{\mathbf{t}}^T X_{\mathbf{t}} \hat{\beta}_{\mathbf{t}} / \sigma^2 > 2\tau_{n,p} n \nu_{\mathbf{t}^*} (\log \epsilon + \delta \log p) / d_1\right] \\ & \leq (n\delta \log p)^{|\mathbf{t}|/2} \exp\{-c_1 \delta (n \log p)\} + n^{-1/2} (\delta \log p)^{-1} \exp\{-c_2 (n \log p)^2 / n\} \\ & \leq c_3 p^{-|\mathbf{k}|(1+\delta)}, \end{aligned} \quad (\text{S19})$$

for some positive constant  $c_1, c_2$ , and  $c_3$ , which proves that (S14) holds.

Next, we consider (S15). Recall that  $\mathbf{u} = \mathbf{k} \cup \mathbf{t}$ . By using (S3), it can be shown that

$$\begin{aligned}
& P \left[ \frac{\pi(\mathbf{k} \mid y)}{\pi(\mathbf{t} \mid y)} > \epsilon n^{-3} p^{-|\mathbf{k}|} n^{-|\mathbf{k} \setminus \mathbf{t}|} |\mathbf{t}|^{-|\mathbf{t}|} \right] \\
& \leq P \left[ C_{n,p}^{-(|\mathbf{k}|+|\mathbf{t}|)} \frac{Q_{\mathbf{k}}}{Q_{\mathbf{t}}} \exp \left\{ -(\tilde{R}_{\mathbf{k}} - \tilde{R}_{\mathbf{t}})/(2\sigma^2) \right\} > \epsilon n^{-3} p^{-|\mathbf{k}|} n^{-|\mathbf{k} \setminus \mathbf{t}|} |\mathbf{t}|^{-|\mathbf{t}|} \right] \\
& \leq P \left[ C_{n,p}^{-|\mathbf{k}|-|\mathbf{t}|} \frac{Q_{\mathbf{k}}}{Q_{\mathbf{t}}} \exp \left\{ -(R_{\mathbf{k}}^* - R_{\mathbf{u}}^*)/(2\sigma^2) \right\} > n^{-3-|\mathbf{k} \setminus \mathbf{t}|} |\mathbf{t}|^{-|\mathbf{t}|} p^{-|\mathbf{k}|(2+\delta)+\delta} \right] \\
& \quad + P \left[ \exp \left\{ (R_{\mathbf{t}}^* - R_{\mathbf{u}}^*)/(2\sigma^2) \right\} \geq \epsilon p^{|\mathbf{k}|(1+\delta)} \right] + P \left[ \exp(\eta/(2\sigma^2)) > p^\delta \right] \\
& \leq P \left[ \exp \left\{ (R_{\mathbf{t}}^* - R_{\mathbf{u}}^*)/2\sigma^2 \right\} > \epsilon p^{|\mathbf{k}|(1+\delta)} \right] \tag{S20}
\end{aligned}$$

$$+ P \left[ \exp(\eta/2\sigma^2) > p^\delta \right] \tag{S21}$$

$$+ P \left[ R_{\mathbf{k}}^* - R_{\mathbf{u}}^* < 2\sigma^2 \|\beta_{\mathbf{t}}^0\|_2^2 n \nu_{\mathbf{u}^*} / \log(\tau_{n,p} / \log p) \right] \tag{S22}$$

$$+ P \left[ Q_{\mathbf{k}}/Q_{\mathbf{t}} > \exp \left\{ \|\beta_{\mathbf{t}}^0\|_2^2 n \nu_{\mathbf{u}^*} / \{2 \log(\tau_{n,p} / \log p)\} \right\} \right]. \tag{S23}$$

Since  $(R_{\mathbf{t}}^* - R_{\mathbf{u}}^*)/\sigma^2$  follows a  $\chi_{|\mathbf{u} \setminus \mathbf{t}|}^2$  distribution, (S20) is also bounded by  $c_1 p^{-|\mathbf{k}|(1+\delta)}$  with some constant  $c_1$ . By following the same steps regarding (S19), one can show that (S21) is bounded by  $c_2 p^{-|\mathbf{k}|(1+\delta)}$  for some constant  $c_2$ . We note that  $(R_{\mathbf{k}}^* - R_{\mathbf{u}}^*)/\sigma^2 \sim \chi_{|\mathbf{u} \setminus \mathbf{k}|}^2(\lambda_n)$  with  $\lambda_n = \beta_{\mathbf{t}}^{0T} X_{\mathbf{t}}^T (P_{\mathbf{u}} - P_{\mathbf{k}}) X_{\mathbf{t}} \beta_{\mathbf{t}}^0$ , where  $P_{\mathbf{k}}$  is the projection matrix of  $X_{\mathbf{k}}$ . As discussed in Narisetty and He (2014),  $\lambda_n \geq n \nu_{\mathbf{u}^*} \|\beta_{\mathbf{t}}^0\|_2^2$ . Hence, by using Lemma 4, one can show that (S22) is bounded by  $\exp\{-c_3 \|\beta_{\mathbf{t}}^0\|_2^2 n \nu_{\mathbf{u}^*} / \log(\tau_{n,p} / \log p)\}$  for some constant  $c_3$ . Lemma 5 states that (S23) is bounded by  $p^{-|\mathbf{k}|(1+\delta)}$ . In summary, since  $q_n \prec \tau_{n,p} / \log p$  by *Assumption 3*, there exists some positive constant  $c_4$  such that  $P[\pi(\mathbf{k} \mid y)/\pi(\mathbf{t} \mid y) > \epsilon n^{-3} p^{-|\mathbf{k}|} n^{-|\mathbf{k} \setminus \mathbf{t}|} |\mathbf{t}|^{-|\mathbf{t}|}] \leq c_4 p^{-|\mathbf{k}|(1+\delta)}$ , which completes the proof of Theorem 1.  $\square$

**Proof of Corollary 2.** Recall the penalty term of a model  $\mathbf{k}$ ,  $Q_{\mathbf{k}}^*$ , based on the piMoM priors is

$$Q_{\mathbf{k}}^* = \int \exp \left\{ -(\beta_{\mathbf{k}} - \hat{\beta}_{\mathbf{k}})^T \Sigma_{\mathbf{k}}^{*-1} (\beta_{\mathbf{k}} - \hat{\beta}_{\mathbf{k}}) / (2\sigma^2) - \sum_{j=1}^{|\mathbf{k}|} \tau_{n,p} / \beta_{\mathbf{k},j}^2 - r \sum_{j=1}^{|\mathbf{k}|} \log(\beta_{\mathbf{k},j}^2) \right\} d\beta_{\mathbf{k}},$$

in (7). Since, for any  $\epsilon > 0$ ,  $\exp \left[ -\sum_{j=1}^{|\mathbf{k}|} \{\epsilon \tau_{n,p} / \beta_{\mathbf{k},j}^2 + r \log(\beta_{\mathbf{k},j}^2)\} \right]$  is bounded above with respect to  $\beta_{\mathbf{k},j}$ ,  $Q_{\mathbf{k}}^* \leq C \int \exp \left\{ -(\beta_{\mathbf{k}} - \hat{\beta}_{\mathbf{k}})^T \Sigma_{\mathbf{k}}^{*-1} (\beta_{\mathbf{k}} - \hat{\beta}_{\mathbf{k}}) / (2\sigma^2) - \sum_{j=1}^{|\mathbf{k}|} (1 - \epsilon) \tau_{n,p} / \beta_{\mathbf{k},j}^2 \right\} d\beta_{\mathbf{k}}$  for some

constant  $C$ . Following the exactly same steps in Lemma 1,  $Q_{\mathbf{k}}^* \leq C'(n\nu_{\mathbf{k}}^*)^{-1/2} \prod_{j=1}^{|\mathbf{k}|} \exp\{-(1 - \epsilon)\tau_{n,p}/(|\widehat{\beta}_{\mathbf{k},j}| + \tilde{\epsilon}_n)^2\}$  for some constant  $C' > 0$ .

We shall show that the model selection procedure based on piMoM priors as in (4) assures consistency by proving that  $Q_{\mathbf{k}}^*$  and  $Q_{\mathbf{k}}$  are asymptotically equivalent.

Next, we shall show that  $Q_{\mathbf{k}}^*$  is bounded below by  $C(n\nu_{\mathbf{k}}^*)^{-1/2} \prod_{j=1}^{|\mathbf{k}|} \exp\{-(1 - \epsilon)\tau_{n,p}/\widehat{\beta}_{\mathbf{k},j}^{*2}\}$  for some constant  $C > 0$  and  $\widehat{\beta}_{\mathbf{k},j}^* \in [\widehat{\beta}_{\mathbf{k},j} - \tilde{\epsilon}_n, \widehat{\beta}_{\mathbf{k},j} + \tilde{\epsilon}_n]$ . Since  $\exp\{-\epsilon\tau_{n,p}/\beta_{\mathbf{k},j}^2 + r \log(\beta_{\mathbf{k},j}^2)\}$  can be minimized in  $[\widehat{\beta}_{\mathbf{k},j} - \tilde{\epsilon}_n, \widehat{\beta}_{\mathbf{k},j} + \tilde{\epsilon}_n]$ , by following the proof of Lemma 1,

$$\begin{aligned} & \int_{-\infty}^{\infty} \exp\{-n\nu_{\mathbf{k}}^*(\beta - \widehat{\beta}_{\mathbf{k},j})^2/(2\sigma^2) - \tau_{n,p}/\beta^2 - r \log(\beta^2)\}d\beta \\ \geq & \int_{\widehat{\beta}_{\mathbf{k},j} - \tilde{\epsilon}_n}^{\widehat{\beta}_{\mathbf{k},j} + \tilde{\epsilon}_n} \exp\{-n\nu_{\mathbf{k}}^*(\beta - \widehat{\beta}_{\mathbf{k},j})^2/(2\sigma^2) - (1 - \epsilon)\tau_{n,p}/\beta^2\} \exp\{-\epsilon\tau_{n,p}/\beta^2 - r \log(\beta^2)\}d\beta \\ \geq & C(n\nu_{\mathbf{k}}^*)^{-1/2} \exp\left\{-(1 - \epsilon)\tau_{n,p}/\widehat{\beta}_{\mathbf{k},j}^{*2}\right\}, \end{aligned}$$

where  $C$  is some constant and  $\widehat{\beta}_{\mathbf{k},j}^* \in [\widehat{\beta}_{\mathbf{k},j} - \tilde{\epsilon}_n, \widehat{\beta}_{\mathbf{k},j} + \tilde{\epsilon}_n] \setminus (-\tilde{\epsilon}_n, \tilde{\epsilon}_n)^c$ .

Therefore, due to the asymptotic similarity between the ridge estimator and the least square estimator, the lower and upper bounds of  $Q_{\mathbf{k}}^*$  are asymptotically equivalent to those of  $Q_{\mathbf{k}}$  with the penalty parameter  $(1 - \epsilon)\tau_{n,p}$ , which assures the strong consistency of the model selection based on the piMoM priors.  $\square$

**Proof of Theorem 3.** Under a situation where  $\sigma^2$  is unknown, it is clear that

$$m_{\mathbf{k}}(y) = \tau_{n,p}^{-\frac{|\mathbf{k}|}{2}} \int (2\pi\sigma^2)^{-\frac{n+|\mathbf{k}|}{2}} \int \exp\left\{|\mathbf{k}| \left(\frac{2}{\sigma^2}\right)^{1/2} - \frac{(\beta_{\mathbf{k}} - \tilde{\beta}_{\mathbf{k}})^T \tilde{\Sigma}_{\mathbf{k}}^{-1} (\beta_{\mathbf{k}} - \tilde{\beta}_{\mathbf{k}})}{2\sigma^2} - \sum_{j=1}^{|\mathbf{k}|} \frac{\tau_{n,p}}{\beta_{\mathbf{k},j}^2}\right\} \pi(\sigma^2) d\beta_{\mathbf{k}} d\sigma^2,$$

where  $\pi(\sigma^2)$  is the prior for  $\sigma^2$  (Inverse-gamma density with hyperparameters  $a_0$  and  $b_0$ ).

First, we shall show that the ratio between marginal likelihoods of a model  $\mathbf{k}$  and the true model

$\mathbf{t}$  can be bounded as

$$\frac{m_{\mathbf{k}}(y)}{m_{\mathbf{t}}(y)} \leq c^{\frac{|\mathbf{k}|-|\mathbf{t}|}{2}} \left( \frac{\tilde{R}_{\mathbf{k}} + 2b_0}{\tilde{R}_{\mathbf{t}} + 2b_0} \right)^{-n/2-a_0} \exp \left\{ - \sum_{j=1}^{|\mathbf{k}|} \frac{\tau_{n,p}}{(|\tilde{\beta}_{\mathbf{k},j}| + \tilde{\epsilon}_n)^2} + \sum_{j=1}^{|\mathbf{t}|} \frac{\tau_{n,p}}{\tilde{\beta}_{\mathbf{t},j}^{*2}} \right\} \frac{(n\nu_{\mathbf{k}^*}\tau_{n,p} + 1)^{-|\mathbf{k}|/2}}{(n\nu_{\mathbf{t}^*}\tau_{n,p} + 1)^{-|\mathbf{t}|/2}}, \quad (\text{S24})$$

where  $\tilde{\beta}_{\mathbf{t},j}^* \in [\tilde{\beta}_{\mathbf{t},j} - \tilde{\epsilon}_n, \tilde{\beta}_{\mathbf{t},j} + \tilde{\epsilon}_n] \setminus (-\tilde{\epsilon}_n, \tilde{\epsilon}_n)^c$  for  $j \in 1, \dots, |\mathbf{t}|$  and  $c$  is some constant. Next, we shall show that  $\{(\tilde{R}_{\mathbf{k}} + 2b_0)/(\tilde{R}_{\mathbf{t}} + 2b_0)\}^{-n/2-a_0} \leq \exp\{-\tilde{R}_{\mathbf{k}} - \tilde{R}_{\mathbf{t}}/(2\sigma_0^2(1 + u_n))\}$ , where  $\sigma_0^2$  is the true regression variance that involves in the data-generating process, and  $u_n$  is some random variable that is concentrated around a finite value with at least probability  $1 - \exp\{-cn\}$  for some constant  $c$ . Then, by following the same steps in the proof of Theorem 1, the proof of Corollary 2 is completed.

By Lemma 1, the marginal likelihood of a model  $\mathbf{k}$  can be bounded by

$$\begin{aligned} m_{\mathbf{k}}(y) &\leq \{c_1(n\nu_{\mathbf{k}^*}\tau_{n,p} + 1)\}^{-\frac{|\mathbf{k}|}{2}} \int (\sigma^2)^{-\frac{n+2a_0}{2}-1} \exp \left\{ |\mathbf{k}| \left( \frac{2}{\sigma^2} \right)^{1/2} - \sum_{j=1}^{|\mathbf{k}|} \frac{\tau_{n,p}}{(|\tilde{\beta}_{\mathbf{k},j}| + \tilde{\epsilon}_n)^2} - \frac{\tilde{R}_{\mathbf{k}} + 2b_0}{2\sigma^2} \right\} d\sigma^2 \\ &\leq \{c_1(n\nu_{\mathbf{k}^*}\tau_{n,p} + 1)\}^{-\frac{|\mathbf{k}|}{2}} \exp \left\{ - \sum_{j=1}^{|\mathbf{k}|} \frac{\tau_{n,p}}{(|\tilde{\beta}_{\mathbf{k},j}| + \tilde{\epsilon}_n)^2} \right\} (1 + \exp\{2|\mathbf{k}|\}) (\tilde{R}_{\mathbf{k}} + 2b_0)^{-\frac{n+2a_0}{2}}, \end{aligned}$$

for some constant  $c_1$ .

Also, by using Lemma 1, one can show that

$$\begin{aligned} m_{\mathbf{k}}(y) &\geq \{c_2(n\nu_{\mathbf{k}^*}\tau_{n,p} + 1)\}^{-\frac{|\mathbf{k}|}{2}} \int (\sigma^2)^{-\frac{n+2a_0}{2}-1} \exp \left\{ |\mathbf{k}| \left( \frac{2}{\sigma^2} \right)^{1/2} - \sum_{j=1}^{|\mathbf{k}|} \frac{\tau_{n,p}}{\tilde{\beta}_{\mathbf{k},j}^{*2}} - \frac{\tilde{R}_{\mathbf{k}} + 2b_0}{2\sigma^2} \right\} d\sigma^2 \\ &\geq \{c_2(n\nu_{\mathbf{k}^*}\tau_{n,p} + 1)\}^{-\frac{|\mathbf{k}|}{2}} \exp \left\{ - \sum_{j=1}^{|\mathbf{k}|} \frac{\tau_{n,p}}{\tilde{\beta}_{\mathbf{k},j}^{*2}} \right\} (\tilde{R}_{\mathbf{k}} + 2b_0)^{-\frac{n+2a_0}{2}}, \end{aligned}$$

where  $c_2$  is some constant and  $\tilde{\beta}_{\mathbf{k},j}^* \in [\tilde{\beta}_{\mathbf{k},j} - \tilde{\epsilon}_n, \tilde{\beta}_{\mathbf{k},j} + \tilde{\epsilon}_n] \setminus (-\tilde{\epsilon}_n, \tilde{\epsilon}_n)^c$  for  $j \in 1, \dots, |\mathbf{k}|$ . These results shows that (S24) holds.

Next, we consider the asymptotic behavior of  $\{(\tilde{R}_{\mathbf{k}} + 2b_0)/(\tilde{R}_{\mathbf{t}} + 2b_0)\}^{-n/2-a_0}$  in (S24). Define

$\rho_n$  as the follows:

$$\rho_n = (\tilde{R}_{\mathbf{t}} + 2b_0)/(n\sigma_0^2) - 1.$$

Since  $-\log(1 - u) < u/(1 - u)$  for  $u \in \mathbb{R}$ ,

$$\begin{aligned} -\log\{(\tilde{R}_{\mathbf{k}} + 2b_0)/(\tilde{R}_{\mathbf{t}} + 2b_0)\} &= -\log[1 + (\tilde{R}_{\mathbf{k}} - \tilde{R}_{\mathbf{t}})/\{n(1 + \rho_n)\sigma_0^2\}] \\ &\leq (\tilde{R}_{\mathbf{t}} - \tilde{R}_{\mathbf{k}})/\{n\sigma_0^2(1 + u_n)\}, \end{aligned}$$

where  $u_n = \rho_n + (\tilde{R}_{\mathbf{k}} - \tilde{R}_{\mathbf{t}})/(n\sigma_0^2)$ .

Since  $(R_{\mathbf{k}}^* - R_{\mathbf{u}}^*)/\sigma_0^2 \sim \chi_{|\mathbf{u} \setminus \mathbf{k}|}(\lambda_n)$  with  $\lambda_n = \beta_{\mathbf{t}}^{0T} X_{\mathbf{t}}^T (P_{\mathbf{u}} - P_{\mathbf{k}}) X_{\mathbf{t}} \beta_{\mathbf{t}}^0 / \sigma_0^2$ , by using Lemma 4 one can show that

$$\begin{aligned} P(|u_n - \lambda_n/n| > \epsilon) &\leq P(|\rho_n| > \epsilon/4) + P\{(R_{\mathbf{t}}^* - R_{\mathbf{u}}^*)/(n\sigma_0^2) > \epsilon/4\} \\ &\quad + P\{|(R_{\mathbf{k}}^* - R_{\mathbf{u}}^*)/(n\sigma_0^2) - \lambda_n/n| > \epsilon/4\} + P(\eta/2n\sigma_0^2 > \epsilon/4) \\ &\leq \exp\{-c'n\} + P\{|(R_{\mathbf{k}}^* - R_{\mathbf{u}}^*)/(n\sigma_0^2) - \lambda_n/n| > \epsilon/4\} \\ &\leq \exp\{-c''n\}, \end{aligned}$$

for some constant  $c'$  and  $c''$ , and  $\eta$  is defined in the proof of Theorem 1. Also, by Assumption 5,  $\lambda_n/n$  will be bounded below and above.  $\square$

**Proof of Corollary 4.** Since we showed that the asymptotic equivalence between  $Q_{\mathbf{k}}$  and  $Q_{\mathbf{k}}^*$  in the proof of Corollary 2, by following exactly same steps in the proof of Theorem 3 we can prove the model selection consistency under piMoM prior densities.  $\square$

**Proof of Proposition 5.** We shall show that for any  $\alpha_{\mathbf{k}} = \hat{\beta}_{\mathbf{k}} + \epsilon_n$  with  $\epsilon_n = \{\epsilon_{n,j}\}_{j=1,\dots,|\mathbf{k}|}$  and  $|\epsilon_{n,j}| \succ \epsilon_n^*$  for at least one  $j \in \{1, \dots, |\mathbf{k}|\}$ ,  $P\{g(\alpha_{\mathbf{k}}; \mathbf{k}) < g(\tilde{\beta}_{\mathbf{k}}^*; \mathbf{k})\} \rightarrow 0$  as  $n$  tends to  $\infty$ , where  $\tilde{\beta}_{\mathbf{k}}^* \in B(\hat{\beta}_{\mathbf{k}}; \epsilon_n^*)$  with  $\epsilon_n^* \asymp (\tau_{n,p}/n)^{1/3}$ . More specifically, we set  $\tilde{\beta}_{\mathbf{k},j}^* = \hat{\beta}_{\mathbf{k},j} + \epsilon_n^*$  for  $j \in \mathbf{t}$  and  $\tilde{\beta}_{\mathbf{k},j}^* = \hat{\beta}_{\mathbf{k},j}$  for  $j \in \mathbf{t}^c$ . Without loss of generality, we assume that  $X_j^T X_j = n$  for  $j = 1, \dots, p$ .

Note that

$$\begin{aligned}
g(\alpha_{\mathbf{k}}; \mathbf{k}) &= \|X_{\mathbf{k}}\alpha_{\mathbf{k}} - X_{\mathbf{k}}\widehat{\beta}_{\mathbf{k}}\|_2^2 + \sum_{j=1}^{|\mathbf{k}|} \tau_{n,p}/|\alpha_{\mathbf{k},j}| + D_n \\
&= \sum_{j=1}^{|\mathbf{k}|} \{c_j n \epsilon_{n,j}^2 + \tau_{n,p}/|\widehat{\beta}_{\mathbf{k},j} + \epsilon_{n,j}|\} + D_n,
\end{aligned}$$

for some constants  $c_j$  such that  $C_L < c_j < C_U$  for  $j = 1, \dots, |\mathbf{k}|$ , and some random variable  $D_n$  that are not relevant to  $\alpha_{\mathbf{k}}$ . Then,

$$\begin{aligned}
&P\{g(\alpha_{\mathbf{k}}; \mathbf{k}) < g(\widetilde{\beta}_{\mathbf{k}}^*; \mathbf{k})\} \\
&\leq P\left[\sum_{j=1}^{|\mathbf{k}|} \left\{c_j n \epsilon_{n,j}^2 + \frac{\tau_{n,p}}{|\widehat{\beta}_{\mathbf{k},j} + \epsilon_{n,j}|}\right\} < \sum_{j=1}^{|\mathbf{k}|} \left\{c_j n \epsilon_n^{*2} + \frac{\tau_{n,p}}{|\widetilde{\beta}_{\mathbf{k},j}^*|}\right\}\right] \\
&\leq P\left[\sum_{j \in S^* \cap S_{\mathbf{k},n}} \left\{c_j n \epsilon_{n,j}^2 + \frac{\tau_{n,p}}{|\widehat{\beta}_{\mathbf{k},j}| + |\epsilon_{n,j}|} - t_{n,j}\right\} < \sum_{j \in S^* \cap S_{\mathbf{k},n}} \left\{c_j n \epsilon_n^{*2} + \frac{\tau_{n,p}}{|\widetilde{\beta}_{\mathbf{k},j}^*|}\right\}\right] \quad (\text{S25}) \\
&+ P\left[\sum_{j \in S^* \cap S_{\mathbf{k},n}^c} \left\{c_j n \epsilon_{n,j}^2 + \frac{\tau_{n,p}}{|\widehat{\beta}_{\mathbf{k},j}| + |\epsilon_{n,j}|} - t_{n,j}\right\} < \sum_{j \in S^* \cap S_{\mathbf{k},n}^c} \left\{c_j n \epsilon_n^{*2} + \frac{\tau_{n,p}}{|\widetilde{\beta}_{\mathbf{k},j}^*|}\right\}\right] \quad (\text{S26}) \\
&+ P\left[\sum_{j \in S^{*c}} \left\{c_j n \epsilon_{n,j}^2 + \frac{\tau_{n,p}}{|\widehat{\beta}_{\mathbf{k},j}| + |\epsilon_{n,j}|} + \sum_{j \in S^*} \frac{t_{n,j}}{|S^{*c}|}\right\} < \sum_{j \in S^{*c}} \left\{c_j n \epsilon_n^{*2} + \frac{\tau_{n,p}}{|\widetilde{\beta}_{\mathbf{k},j}^*|}\right\}\right], \quad (\text{S27})
\end{aligned}$$

where  $t_n$  is an arbitrary sequence such that  $t_{n,j} = n^{2/3} \tau_{n,p}^{1/3} \epsilon_{n,j}$ , and  $S^* = \{j \in \{1, \dots, p\} : |\epsilon_{n,j}| \succ \epsilon_n^*\}$ , and  $S_{\mathbf{k},n} = \{j \in \mathbf{k} : |\widehat{\beta}_{\mathbf{k},j}| < \epsilon_n^*\}$ . Then, to complete the proof, it is sufficient to show that each of (S25), (S26), and (S27) converges to zero.

Since  $n(\widehat{\beta}_{\mathbf{k},j} - \beta_{\mathbf{t},j}^0)^2/\sigma^2 \sim \chi_1^2$  for  $j = 1, \dots, |\mathbf{k}|$ ,

$$P(|\widehat{\beta}_{\mathbf{t},j} - \beta_{\mathbf{t},j}^0| > \zeta_n) \leq (\pi n \zeta_n^2/2)^{-1/2} \exp\{-n \zeta_n^2/(2\sigma^2)\},$$

for any  $\zeta_n > 0$ . This implies that  $S_{\mathbf{k},n} = \mathbf{t}$  at least probability  $1 - |\mathbf{t}^c|(\pi n \epsilon_n^{*2}/2)^{-1/2} \exp\{-n \epsilon_n^{*2}/(2\sigma^2)\}$ .

Therefore, the equation (S25) can be asymptotically bounded by

$$\begin{aligned} & \sum_{j \in S^* \cap \mathbf{t}} P \left[ c_j n \epsilon_{n,j}^2 + \frac{\tau_{n,p}}{2|\epsilon_{n,j}|} - t_{n,j} < c_j n \epsilon_n^{*2} + \frac{\tau_{n,p}}{|\widehat{\beta}_{\mathbf{k},j} + \epsilon_n^*|} \right] \\ & \leq \sum_{j \in S^* \cap \mathbf{t}} P \left[ |\widehat{\beta}_{\mathbf{k},j} + \epsilon_n^*| < c \tau_{n,p} (n \epsilon_{n,j}^2 - t_{n,j} + \tau_{n,p}/|\epsilon_{n,j}|)^{-1} \right], \end{aligned}$$

for some positive constant  $c$ . Consider Lemma 4 with  $\lambda_n = n \epsilon_n^{*2} / \sigma^2$  and  $w_n = c^2 \tau_{n,p}^2 / \{\epsilon_n^{*2} (n \epsilon_{n,j}^2 - t_{n,j} + \tau_{n,p}/|\epsilon_{n,j}|)^2\}$  for  $j \in S^* \cap \mathbf{t}$ . Since  $n \epsilon_{n,j}^2 \succ n^{1/3} \tau_{n,p}^{2/3}$  for  $j \in S^*$  implies  $w_n \rightarrow 0$ , Lemma 4 guarantees that the last display is bounded by  $c' |S^* \cap \mathbf{t}| \lambda_n^{-1} \exp\{-\lambda_n (1 - w_n)^2\}$  for some constant  $c'$ , which means that (S25) converges to zero as  $n$  tends to 0. By following the same steps, one can show that (S26) converges to zero.

Also, (S27) can be asymptotically bounded by

$$\begin{aligned} & \sum_{j \in S^{*c} \cap \mathbf{t}} P \left[ c_j n \epsilon_{n,j}^2 + \frac{\tau_{n,p}}{2|\epsilon_{n,j}|} + c \min_{j \in S^*} t_{n,j} < c_j n \epsilon_n^{*2} + \frac{\tau_{n,p}}{|\widehat{\beta}_{\mathbf{k},j} + \epsilon_n^*|} \right] \\ & + \sum_{j \in S^{*c} \cap \mathbf{t}^c} P \left[ c_j n \epsilon_{n,j}^2 + \frac{\tau_{n,p}}{2|\widehat{\beta}_{\mathbf{k},j} + \epsilon_n^*|} + c \min_{j \in S^*} t_{n,j} < c_j n \epsilon_n^{*2} + \frac{\tau_{n,p}}{|\widehat{\beta}_{\mathbf{k},j} + \epsilon_n^*|} \right] \\ & \leq \sum_{j \in S^{*c} \cap \mathbf{t}} P \left[ |\widehat{\beta}_{\mathbf{k},j} + \epsilon_n^*| < c' \tau_{n,p} (n \epsilon_{n,j}^2 - n \epsilon_n^{*2} + c \min_{j \in S^*} t_{n,j} + \tau_{n,p}/|\epsilon_{n,j}|)^{-1} \right] \\ & + \sum_{j \in S^{*c} \cap \mathbf{t}^c} P \left[ |\widehat{\beta}_{\mathbf{k},j} + \epsilon_n^*| < c'' \tau_{n,p} (n \epsilon_{n,j}^2 - n \epsilon_n^{*2} + c \min_{j \in S^*} t_{n,j} + \tau_{n,p}/|\epsilon_{n,j}|)^{-1} / 2 \right], \end{aligned}$$

where  $c$ ,  $c'$ , and  $c''$  are some positive constants. For the first term in the last line of the above display, by setting  $\lambda_n = n \epsilon_n^{*2} / \sigma^2$  and  $w_n = c^2 \tau_{n,p}^2 / \{\epsilon_n^{*2} (n \epsilon_{n,j}^2 - n \epsilon_n^{*2} + c \min_{j \in S^*} t_{n,j} + \tau_{n,p}/|\epsilon_{n,j}|)^2\}$ , we can apply Lemma 4. Since  $w_n \prec \tau_{n,p}^2 (\epsilon_n^* \min_{j \in S^*} t_{n,j})^{-2}$  implies  $w_n \rightarrow 0$ , the first term in the above display converges to zero by Lemma 4. Similarly, the second term also converges to zero.  $\square$

### 3 Laplace Approximations of Marginal Likelihoods

In this section, we provide the Laplace approximation of the marginal likelihoods based on the nonlocal priors. Because closed form expressions for posterior model probabilities based on modified peMoM priors and modified piMoM priors are not available, we estimate the posterior model probabilities using Laplace approximations. For posterior probabilities based on the peMoM priors, an inverse-Gamma density with parameters  $(a_0, b_0)$  on  $\sigma^2$  the Laplace approximation to the marginal density of the data for model  $\mathbf{k}$  can be expressed as

$$\pi(\mathbf{k} | y) \propto (2\pi)^{|\mathbf{k}|/2} |V(\beta_{\mathbf{k}}^*, \sigma^{2*})|^{-1/2} \exp\{f(\beta_{\mathbf{k}}^*, \sigma^{2*})\} p(\mathbf{k}), \quad (\text{S28})$$

where

$$\begin{aligned} (\beta_{\mathbf{k}}^*, \sigma^{2*}) &= \underset{(\beta_{\mathbf{k}}, \sigma^2)}{\operatorname{argmax}} f(\beta_{\mathbf{k}}, \sigma^2) \\ f(\beta_{\mathbf{k}}, \sigma^2) &= -(n/2 + |\mathbf{k}|/2 + a_0 + 1) \log \sigma^2 - (y - X_{\mathbf{k}}\beta_{\mathbf{k}})^T (y - X_{\mathbf{k}}\beta_{\mathbf{k}}) / (2\sigma^2) - \beta_{\mathbf{k}}^T \beta_{\mathbf{k}} / (2\sigma^2 \tau_{n,p}) \\ &\quad - \sum_{j=1}^{|\mathbf{k}|} \tau_{n,p} / \beta_{\mathbf{k},j}^2 + |\mathbf{k}| (2/\sigma^2)^{1/2} - b_0 / \sigma^2 + |\mathbf{k}| (\log \tau_{n,p}) / 2, \end{aligned}$$

and  $V(\beta_{\mathbf{k}}, \sigma^2)$  is a  $(|\mathbf{k}| + 1) \times (|\mathbf{k}| + 1)$  matrix with the following blocks:

$$\begin{aligned} V_{11} &= X_{\mathbf{k}}^T X_{\mathbf{k}} / \sigma^2 + I_{\mathbf{k}} / \sigma^2 \tau_{n,p} + \operatorname{diag} \{6\tau_{n,p} / \beta_{\mathbf{k},j}^4\}_{j=1, \dots, |\mathbf{k}|} \\ V_{12} &= X_{\mathbf{k}}^T (y - X_{\mathbf{k}}\beta_{\mathbf{k}}) / \sigma^4 - \beta_{\mathbf{k}} / \{\sigma^4 \tau_{n,p}\} \\ V_{22} &= -(n/2 + |\mathbf{k}|/2 + a_0 + 1) / \sigma^4 + (y - X_{\mathbf{k}}\beta_{\mathbf{k}})^T (y - X_{\mathbf{k}}\beta_{\mathbf{k}}) / \sigma^6 - \beta_{\mathbf{k}}^T \beta_{\mathbf{k}} / \tau_{n,p} \\ &\quad - 3|\mathbf{k}| 2^{1/2} \sigma^{-5} / 4 + 2b_0 / \sigma^6. \end{aligned}$$

For the piMoM priors on  $\beta_{\mathbf{k}}$ , the Laplace approximation of the posterior model probability can be expressed as in (S28), but with

$$f(\beta_{\mathbf{k}}, \sigma^2) = - (n/2 + a_0 + 1) \log \sigma^2 - (y - X_{\mathbf{k}}\beta_{\mathbf{k}})^T (y - X_{\mathbf{k}}\beta_{\mathbf{k}}) / (2\sigma^2) \\ - \sum_{j=1}^{|\mathbf{k}|} \{ r \log(\beta_{\mathbf{k},j}^2) + \tau_{n,p} / \beta_{\mathbf{k},j}^2 \} + |\mathbf{k}| \{ (r - 1/2) \log \tau_{n,p} - \log \Gamma(r - 1/2) \} - b_0 / \sigma^2,$$

and  $V(\beta_{\mathbf{k}}, \sigma^2)$  a  $(|\mathbf{k}| + 1) \times (|\mathbf{k}| + 1)$  matrix with the following blocks:

$$V_{11} = X_{\mathbf{k}}^T X_{\mathbf{k}} / \sigma^2 + \text{diag} \{ 6\tau_{n,p} / \beta_{\mathbf{k},j}^4 - 2r / \beta_{\mathbf{k},j}^2 \}_{j=1, \dots, |\mathbf{k}|} \\ V_{12} = X_{\mathbf{k}}^T (y - X_{\mathbf{k}}\beta_{\mathbf{k}}) / \sigma^4 \\ V_{22} = -(n/2 + a_0 + 1) / \sigma^4 + (y - X_{\mathbf{k}}\beta_{\mathbf{k}})^T (y - X_{\mathbf{k}}\beta_{\mathbf{k}}) / \sigma^6 + 2b_0 / \sigma^6.$$
